# Supplementary material for: Assessment of Hygienic Practices in Beef Cattle Slaughterhouses and Retail Shops in Bishoftu, Ethiopia: Implications for Public Health
Source: MDPI journal article supplement (doi:10.3390/ijerph18052729), 2021-03-08
Supplement: s1 [file s1]

---

## I. Questions and check list to assess hygienic handling practices at slaughterhouses

---

### A. Basic information

1. Date \_\_\_\_\_
2. Code \_\_\_\_\_

### B. Sociodemographic characteristics of the respondents

1. Sex: Male ☐ Female ☐
2. Age: \_\_\_\_\_
3. Level of Education: Illiterate ☐ Informal Education ☐ Primary Education ☐ Secondary Education ☐  
Other (Specify) \_\_\_\_\_
4. Duration of working at the slaughter houses (in years)? \_\_\_\_\_
5. Duty at the slaughter houses? Veterinarian/meat inspector ☐ Stunning ☐ De-hiding ☐  
Other (specify) \_\_\_\_\_

### C. Hygienic handling practices at slaughterhouses

#### C-1. Check list for observations

1. Stunning before slaughter: Yes ☐ No ☐
2. Stunning method: \_\_\_\_\_
3. Waiting time to start dehiding after stunning and bleeding: \_\_\_\_\_
4. Method of carcass dressing: Vertical (hanging) Horizontal (on floor):
5. Presence of sink for washing hands in the slaughterhouse: Yes ☐ No ☐
6. Carcass washing after evisceration: Yes ☐ No ☐
7. Use of the following protective materials while working in the slaughterhouse:

| Protective materials | Response |    |
|----------------------|----------|----|
|                      | Yes      | No |
| Apron                |          |    |
| white coat           |          |    |
| Head cover           |          |    |
| Gloves               |          |    |
| Boots                |          |    |

## **C-2. Questions for face to face interviews**

1. Do you wash your hands frequently during slaughter operation: Yes ☐ No ☐
  2. Do you wash your hands with soap: Yes ☐ No ☐
  3. Do you use the same knife for dehiding and evisceration: Yes ☐ No ☐
  4. Do you wash your hands in between activities: Yes ☐ No ☐
  5. Do you sink the knife in hot water after each activity: Yes ☐ No ☐
  6. What do you think is the possible sources for carcass contamination: ☐ Feces during evisceration ☐ hides during dehiding ☐ handlers hand ☐ knife ☐ floor ☐ hanging hook ☐ Others(specify)\_\_\_\_\_
  7. What is the source of water used in the slaughterhouse: City/Municipal tap water ☐ borehole ☐ collected rain water ☐ River ☐ others (specify) \_\_\_\_\_
  8. Have you ever received any training on hygienic handling of meat: Yes ☐ No ☐
  9. Have you gone for medical checkups to work at the slaughterhouse: Yes ☐ No ☐
  10. If yes, how frequent you go for medical checkup: every three months ☐ every six months ☐ once per year ☐
  11. Do you think improvements are needed to avoid contamination of carcass at the slaughterhouse:  
Yes ☐ No ☐
  12. If yes, what kind of improvement: \_\_\_\_\_
-

---

## II. Questions for face to face interview and check list for direct observation to assess hygienic handling practices at beef retailshops

---

### A. Basic information

1. Date\_\_\_\_\_
2. Code\_\_\_\_\_

### B. Sociodemographic of characteristics

1. Sex: Male [ ] Female [ ]
2. Age\_\_\_\_\_
3. Level of Education: Illiterate [ ] Informal Education [ ] Primary Education [ ] Secondary Education [ ]  
Other (specify)\_\_\_\_\_
4. Duration of working at meat retail outlet (in years)? \_\_\_\_\_
5. Religion\_\_\_\_\_
6. Ethnicity\_\_\_\_\_

### C. Hygienic handling practices at slaughterhouses

#### C-1. Check list for observations

1. Presence of any cover on meat display case: Yes [ ] No [ ]
2. Retail shop floor is made of : Concrete [ ] Tile [ ] Wood earthen material [ ] others(specify)\_\_\_\_\_
3. Wall and ceiling are clean or free of dust: Yes [ ] No [ ]
4. Wall painted with white color: Yes [ ] No [ ]
5. Ventilation status of display case and butchery: Good [ ] Fair [ ] Poor [ ]  
**Good**-ventilation allows air flow into the butchery but sieves off dust and other particles [ ]  
**Fair**-ventilation allows air flow but do not sieve dust or other particles or allows very little air flow [ ]  
**Poor**-ventilation does not allow air flow at all [ ]
6. Presence and use of bulbs at the display case: Yes [ ] No [ ]
7. Meat cooling facility (refrigerator) at the display cabinet: Yes [ ] No [ ]
8. Presence of sink for washing hands at beef sale point: Yes [ ] No [ ]
9. Type/kind of cutting board used: Wood [ ] plastic [ ] Metal [ ] concrete [ ] Marble [ ]
10. Presence of hot water baths for dipping knives: Yes [ ] No [ ]
11. Material used to pack or wrap meat for sale: Newspaper [ ] Plastic [ ] Used paper [ ]
12. Use the following protective materials while selling or handling meat:

| Protective materials | Response |    |
|----------------------|----------|----|
|                      | Yes      | No |
| Apron/white coat     |          |    |
| Head cover           |          |    |
| Gloves               |          |    |

## C-2. Questions for face to face interviews

1. What is the means of transporting meat from slaughterhouse to the retail shop: Open vehicle ☐ Closed vehicle ☐ Animal transport (Cart horse) ☐
2. How frequent do you use washed the protective coat (white coat and apron): Once per day in the evening ☐ Twice per day, morning and evening ☐ Once after every two days ☐ Once per week ☐ others ☐ \_\_\_\_\_
3. Do you have a refrigerator for storage of the meat that remains from daily sale: Yes ☐ No ☐
4. Do you wash your hands before touching meat: Yes ☐ No ☐
5. Do you wash your hands with soap: Yes ☐ No ☐
6. What is the source of water for use in the butchery: City/Municipal tap water ☐ borehole ☐ rain collected water ☐ river ☐ others (specify) ☐
7. How often do you wash the following butchery surfaces and equipment:

| Frequency of washing        | Equipments /surfaces |                |          |                 |       |        |
|-----------------------------|----------------------|----------------|----------|-----------------|-------|--------|
|                             | Knife                | Cutting boards | Saw/Axes | Display cabinet | Hooks | Floors |
| Once per day in the morning |                      |                |          |                 |       |        |
| Once per day in the evening |                      |                |          |                 |       |        |
| Twice per day               |                      |                |          |                 |       |        |
| More than twice             |                      |                |          |                 |       |        |
| Once in every two days      |                      |                |          |                 |       |        |
| Others (specify)            |                      |                |          |                 |       |        |

8. Do you use detergent/disinfectant for cleaning the butchery utensils: Yes [ ] No [ ]
9. If “Yes” what types of detergent/disinfectant:\_\_\_\_\_
10. What is the way of cleaning butchery equipment: Using cold water only [ ], cold water with soap [ ] hot water only [ ] hot water with soap [ ] wiping with pieces of fabrics [ ] others (specify)\_\_\_\_\_
11. Is there routine control of flies at the retail shop: Yes [ ] No [ ]
12. If “Yes”, what is the method used to control flies: \_\_\_\_\_
13. How long does the meat stay in your butchery before it is sold? Less than 12 hours [ ] One day [ ] Two days [ ]
14. Do you collect money while handling or selling meat: Yes [ ] No [ ]
15. Have you ever received any training on hygienic handling of meat: Yes [ ] No [ ]
16. Do you ever receive complaints from the consumers on the quality of the meat you sell: Yes [ ] No [ ]
17. If yes, what kind of complaint: Abdominal upsets [ ] Tough meat [ ] Dirty meat [ ] others [ ]\_\_\_\_\_
18. Have you gone for medical checkups in the last 6 months: Yes [ ] No [ ]
19. How frequent you go for medical checkup: Every three months [ ] very six months [ ] Once per year [ ]
20. Do you have different storage and display cabinets for offal’s and meat: Yes [ ] No [ ]
21. Do you use the same equipment’s such as knife while handling meat and the offals: Yes [ ] No [ ]
22. Do you believe that the butchery where are you working requires some improvement for better handling of meat: Yes [ ] No [ ]
23. If yes, what kind of improvement:\_\_\_\_\_
-
